# Supplementary material
Source: Springer Nature journal article supplement (https://www.springermedizin.de/resource/supplementary/12943_2011_1022_MOESM6_ESM.pdf/9552068)

A

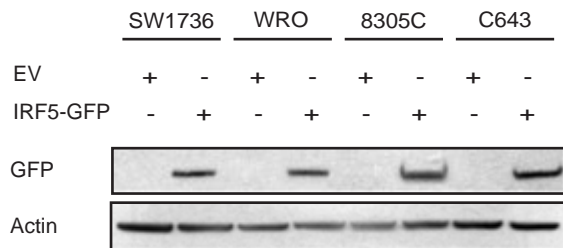

B

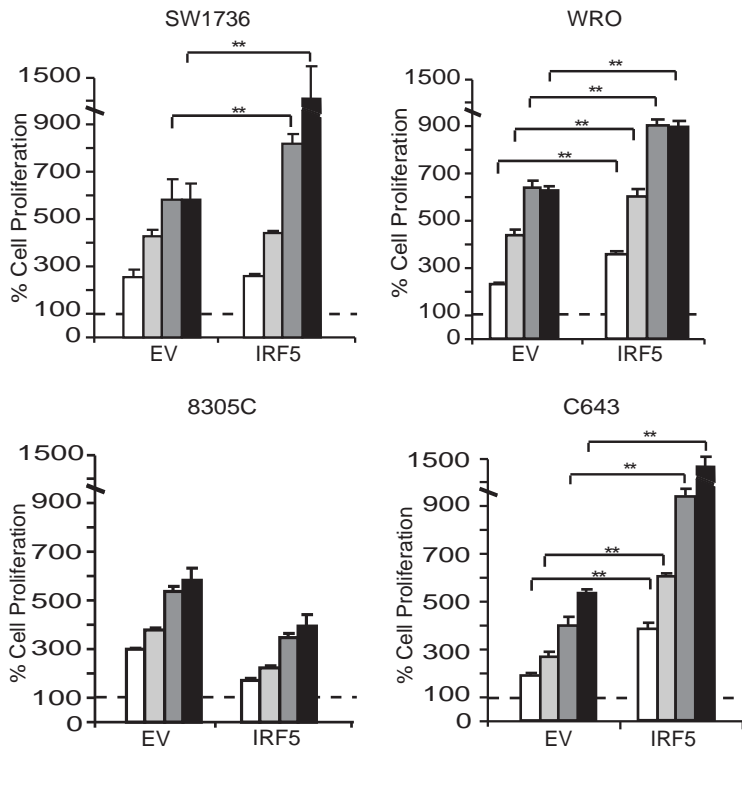

C

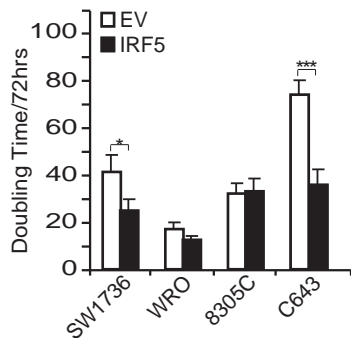

Supplement: MOESM6 [file 9552068]
